# Supplementary material for: Adsorption of anthracene substitutes into suprachannels: bulk vs. included guests
Source: Royal Society of Chemistry journal article supplement (doi:10.1039/c8ce02185f), 2019-01-01
Supplement: c8ce02185f1.pdf [file c8ce02185f1.pdf]

<Electronic supplementary information (ESI)>

**Adsorption of anthracene substitutes into suprachannels: bulk vs included  
guests**

Daseul Lee,<sup>a</sup> Dongwon Kim,<sup>a</sup> Haeri Lee,<sup>a</sup> Tae Hwan Noh,<sup>b</sup> Young-A Lee<sup>b</sup> and Ok-Sang Jung<sup>\*a</sup>

*<sup>a</sup>Department of Chemistry, Pusan National University, Pusan 46241, Korea*

*<sup>b</sup>Departments of Chemistry and Chemistry Education, Chunbuk National University, Jeonju 54896,  
Korea*

## Refinements of structures with the SQUEEZE routine in *PLATON*

For  $[\text{Ag}_3\text{L}_2](\text{OTf})_3 \cdot 4\text{CH}_3\text{OH} \cdot 2\text{CHCl}_3$ , one of the three counteranions and solvate molecules in the voids were highly disordered and were impossible to refine using conventional discrete-atom model. The terminal pyridyl groups combined with the amide moiety can rotate freely through the single bond, and thus, they seem to induce the statistical disorder of the structure. Therefore, the residual electron density was treated as diffuse contributions using the SQUEEZE of the PLATON software and located a series of voids.

For  $[\text{Ag}_3\text{L}_2](\text{OTf})_3 \cdot 4\text{CH}_3\text{OH} \cdot 2\text{CHCl}_3$ ,

```
_platon_squeeze_void_nr
_platon_squeeze_void_average_x
_platon_squeeze_void_average_y
_platon_squeeze_void_average_z
_platon_squeeze_void_volume
_platon_squeeze_void_count_electrons
_platon_squeeze_void_content
  1 -0.003 -0.003 -0.006   9497   2507 ''
  2  0.500 -0.002  0.250    121    30 ''
  3  0.500  0.002  0.750    116    30 ''
  4  0.000  0.498  0.250    121    30 ''
  5  0.000  0.502  0.750    116    30 ''
_platon_squeeze_void_probe_radius      1.20
_platon_squeeze_details                ?
```

**Table S1.** Fluorescence lifetime (nm) of 9,10-H<sub>2</sub>ANT and 9,10-(EtO)<sub>2</sub>ANT in 9,10-H<sub>2</sub>ANT-  
 $\subset$ [Ag<sub>3</sub>L<sub>2</sub>](OTf)<sub>3</sub>·4CH<sub>3</sub>OH·2CHCl<sub>3</sub>, 9,10-(EtO)<sub>2</sub>ANT $\subset$ [Ag<sub>3</sub>L<sub>2</sub>](OTf)<sub>3</sub>·4CH<sub>3</sub>OH·2CHCl<sub>3</sub>, and  
 9,10-H<sub>2</sub>ANT·9,10-(EtO)<sub>2</sub>ANT $\subset$ [Ag<sub>3</sub>L<sub>2</sub>](OTf)<sub>3</sub>·4CH<sub>3</sub>OH·2CHCl<sub>3</sub> in the solid-state at room  
 temperature.

|                                                                                                                                                              | $\lambda_{em}$ | $\tau_1$ | $\tau_2$ | $\tau_3$ | $\tau_m$ |
|--------------------------------------------------------------------------------------------------------------------------------------------------------------|----------------|----------|----------|----------|----------|
| 9,10-H <sub>2</sub> ANT<br>$\subset$ [Ag <sub>3</sub> L <sub>2</sub> ](OTf) <sub>3</sub> ·4CH <sub>3</sub> OH·2CHCl <sub>3</sub>                             | 409 nm         | 0.81     | 3.7      | 12       | 7.81     |
| 9,10-(EtO) <sub>2</sub> ANT<br>$\subset$ [Ag <sub>3</sub> L <sub>2</sub> ](OTf) <sub>3</sub> ·4CH <sub>3</sub> OH·2CHCl <sub>3</sub>                         | 450 nm         | 2.3      | 12.2     | 78       | 13       |
| 9,10-H <sub>2</sub> ANT·9,10-(EtO) <sub>2</sub> ANT<br>$\subset$ [Ag <sub>3</sub> L <sub>2</sub> ](OTf) <sub>3</sub> ·4CH <sub>3</sub> OH·2CHCl <sub>3</sub> | 406 nm         | 0.66     | 2.66     | 7.8      | 3.31     |
|                                                                                                                                                              | 450 nm         | 2.9      | 14       | 90       | 16       |

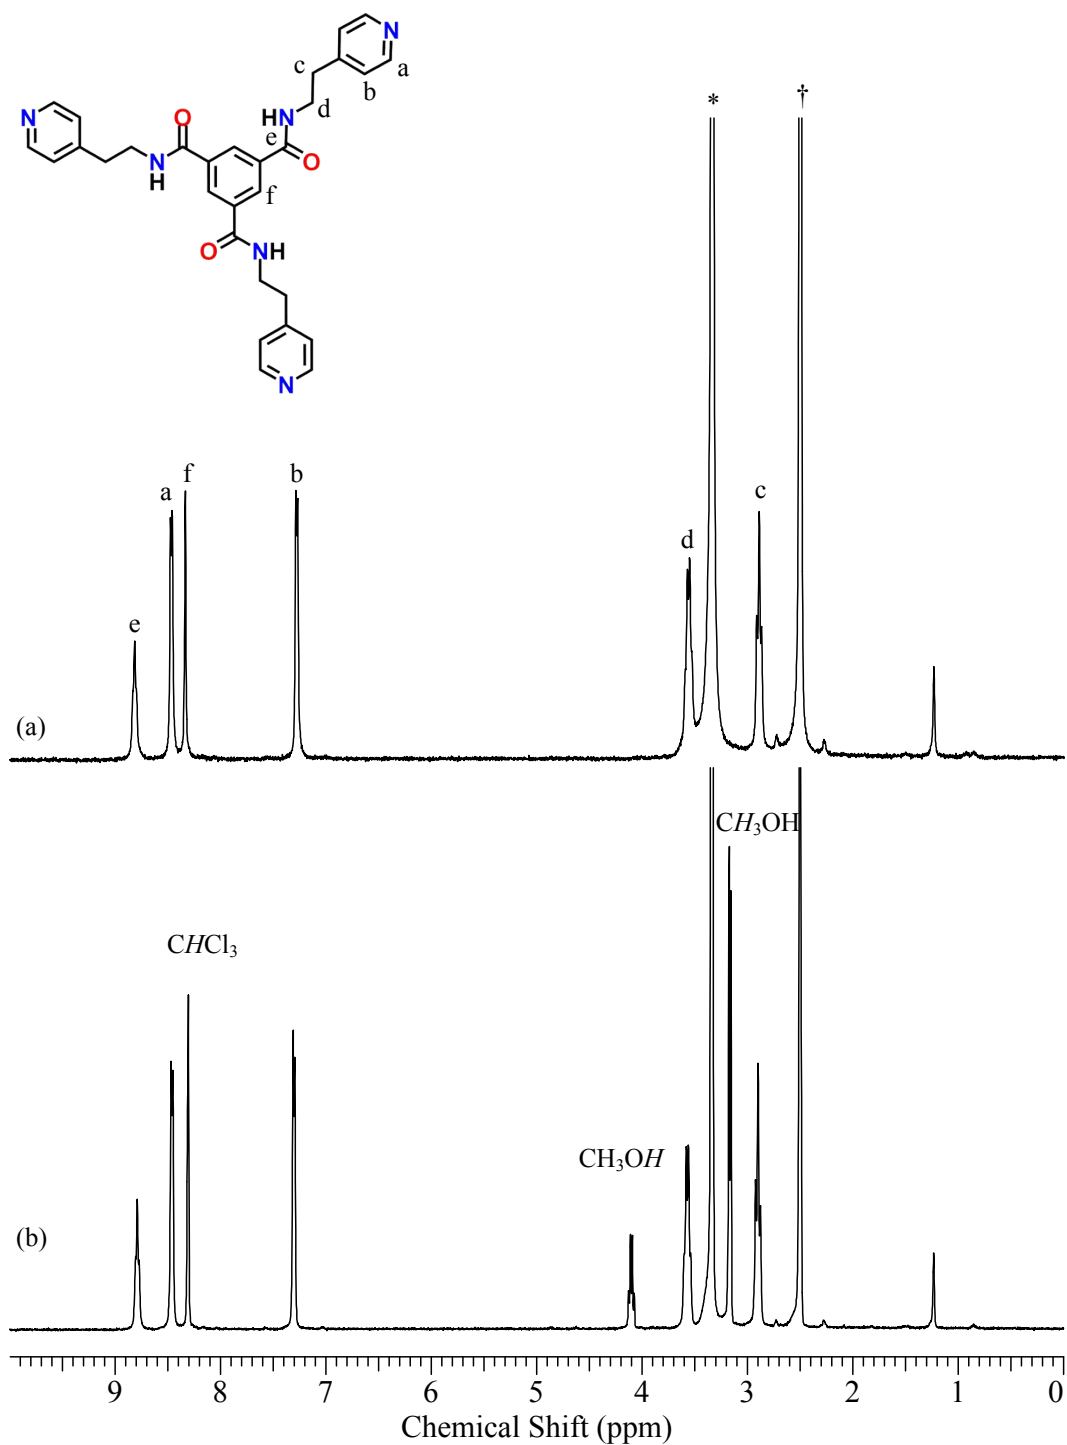

**Fig. S1.**  $^1\text{H}$  NMR spectra (in  $\text{Me}_2\text{SO}-d_6$ ) of **L** (a) and  $[\text{Ag}_3\text{L}_2](\text{OTf})_3 \cdot 4\text{CH}_3\text{OH} \cdot 2\text{CHCl}_3$  (b), indicating that the complex is fully dissociated in  $\text{Me}_2\text{SO}$ .

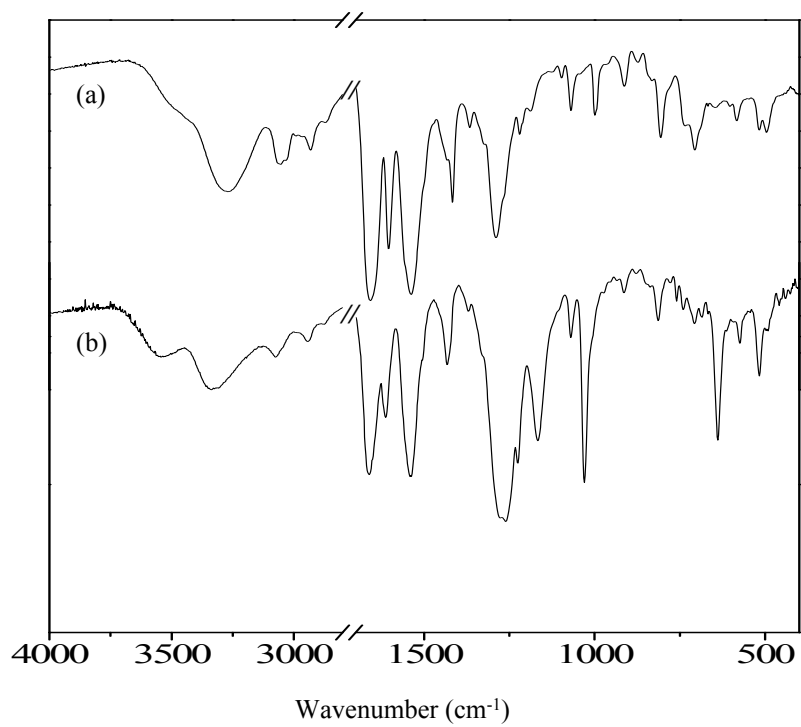

**Fig. S2.** FT-IR spectra of L (a) and  $[\text{Ag}_3\text{L}_2](\text{OTf})_3 \cdot 4\text{CH}_3\text{OH} \cdot 2\text{CHCl}_3$  (b).

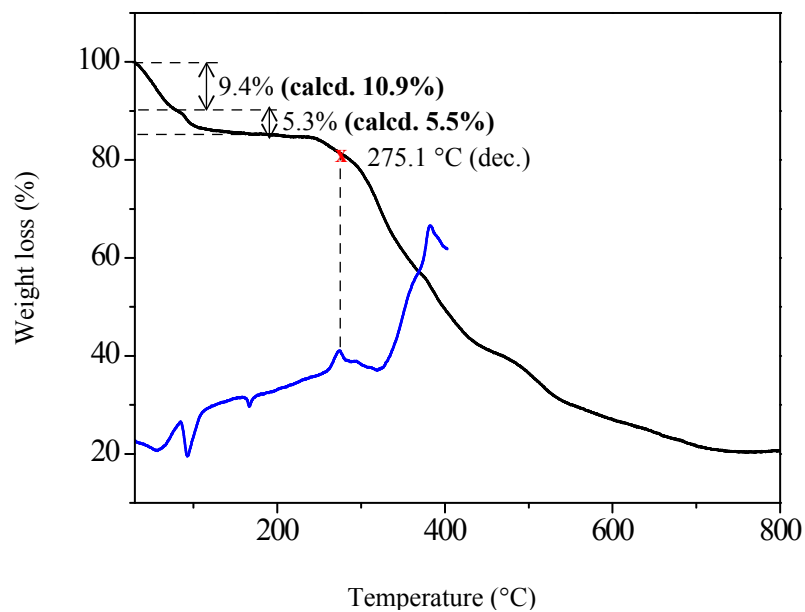

**Fig. S3.** TGA (black line) and DSC (blue) curves of  $[\text{Ag}_3\text{L}_2](\text{OTf})_3 \cdot 4\text{CH}_3\text{OH} \cdot 2\text{CHCl}_3$ . Weight loss: calcd, 10.9%; found, 9.4% ( $2\text{CHCl}_3$ ); calcd, 5.5%; found, 5.3% ( $4\text{CH}_3\text{OH}$ ); dec. temp. of skeleton: 271.5 °C.

(a)

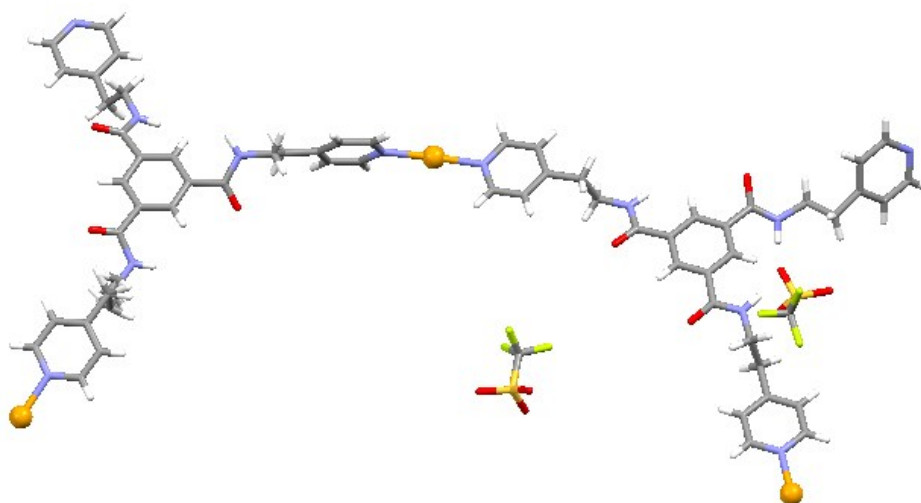

(b)

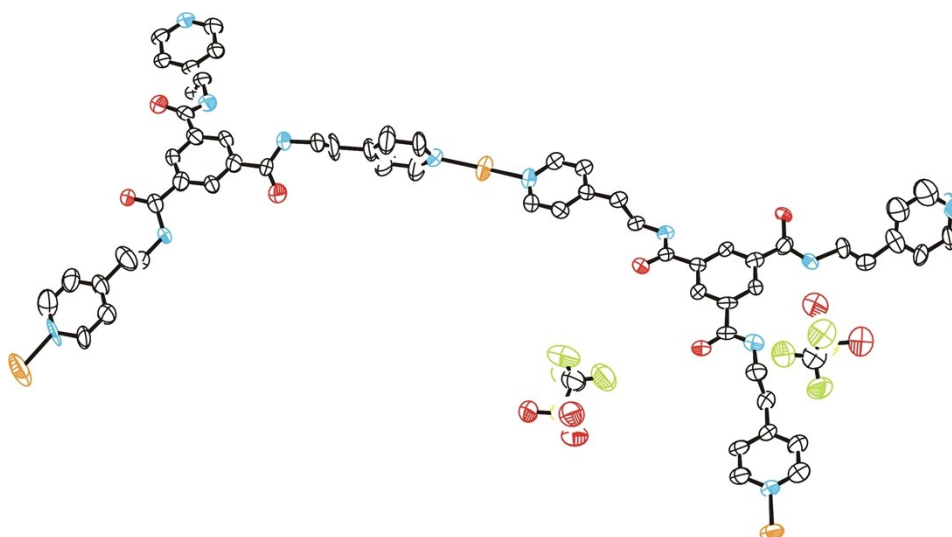

**Fig. S4.** Coordination views: Ball-and-stick (a) and ORTEP (b).

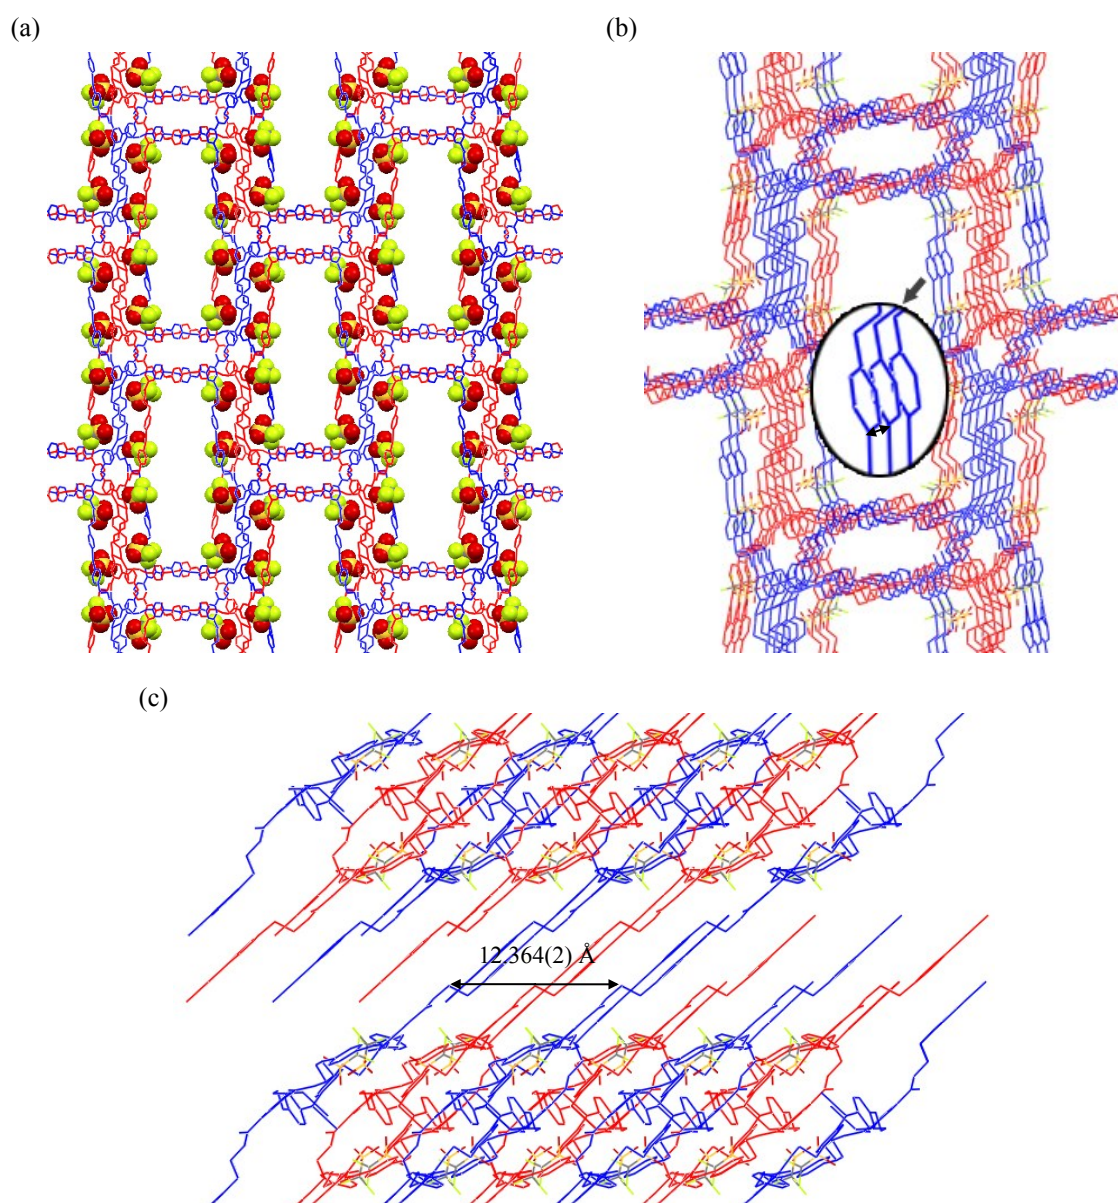

**Fig. S5.** Crystal structure of  $[\text{Ag}_3\text{L}_2](\text{OTf})_3 \cdot 4\text{CH}_3\text{OH} \cdot 2\text{CHCl}_3$ : (a) packing structure of 2D channels, (b) top views and (c) side views.



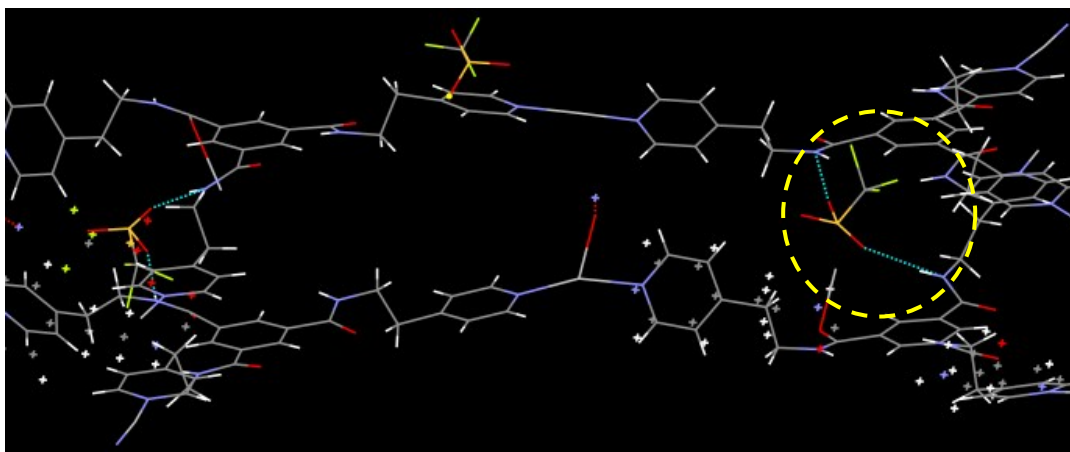

**Fig. S6.** Crystal structure of the triflate anions bridge between two amide groups.

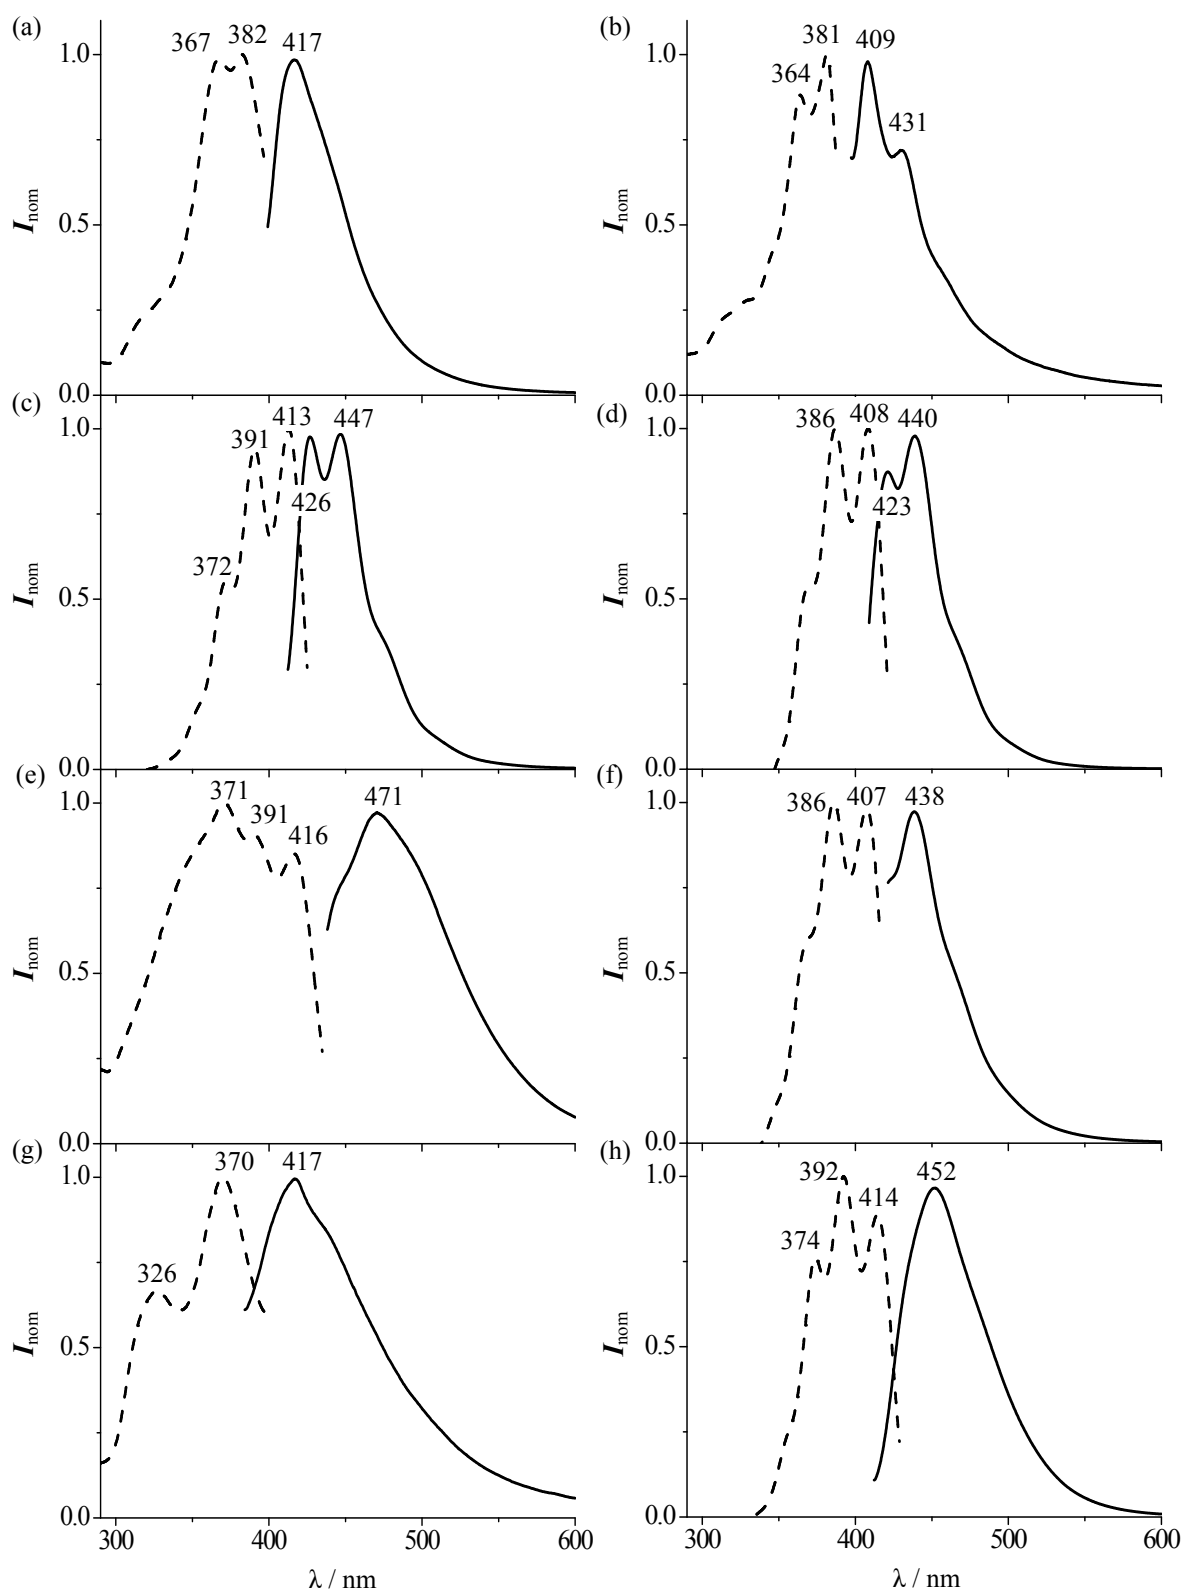

**Fig. S7.** Solid-state excitation spectra (dashed line) and emission spectra (solid line) of  $\text{AS}[\text{Ag}_3\text{L}_2](\text{OTf})_3 \cdot 4\text{CH}_3\text{OH} \cdot 2\text{CHCl}_3$ . a) ANT; b) 9,10- $\text{H}_2$ ANT; c) 9,10- $\text{Br}_2$ ANT; d) 9,10- $\text{Cl}_2$ ANT; e) 9,10-(ClMe) $_2$ ANT; f) 9,10- $\text{Me}_2$ ANT; g) 9,10-(NC) $_2$ ANT; h) 9,10-(EtO) $_2$ ANT.
